# Supplementary material
Source: PubMed Central journal article supplement (PMC5378466)
Supplement: NIHMS853904-supplement-Supplemental_Materials.pdf [file NIHMS853904-supplement-Supplemental_Materials.pdf]

## **SUPPLEMENTAL MATERIAL**

### **Magnetic Resonance Imaging of Cardiac Strain Pattern Following Transplantation of Human Tissue Engineered Heart Muscles**

Xulei Qin, PhD;\* Johannes Riegler, PhD;\* Malte Tiburcy, MD; Xin Zhao, PhD; Tony Chour, BS; Babacar Ndoeye, BS; Michael T. Nguyen, BS; Jackson Adams, BS; Mohamed Ameen, BS;

Thomas S. Denney Jr., PhD; Phillip C. Yang, MD; Patricia Nguyen, MD;

Wolfram H. Zimmermann, MD; Joseph C. Wu, MD, PhD

Stanford Cardiovascular Institute and Department of Medicine, Division of Cardiology, Stanford, CA (X.Q., J.R., X.Z., T.C., B.D., M.T.N., J.A., M.A., P.C.Y., P.N., J.C.W.); Auburn University MRI Research Center, Department of Electrical and Computer Engineering, Auburn University, Auburn, AL (T.S.D.Jr.); Institute of Pharmacology, Heart Research Center, University Medical Center, Georg-August-University and German Center for Cardiovascular Research, Göttingen, Germany (M.T., W.H.Z.).

\*X.Q. and J.R. contributed equally to this study.

**Correspondence:** Dr. Joseph C. Wu, 265 Campus Drive, Room G1120B, Stanford, CA 94305-5454. Email: [joewu@stanford.edu](mailto:joewu@stanford.edu)

**Supplemental Table 1. Global measurements of systolic function at D-1 and D28**

| <b>Conventional measurements</b> | <b>Healthy (n=6)</b> | <b>Control (n=10)</b> | <b>EHM (n=12)</b> |
|----------------------------------|----------------------|-----------------------|-------------------|
| LV mass (mg)                     | 472.1±14.1           | 506.2±10.8            | 554.4±13.9        |
| EDV (μl)                         | 371.3±12.7           | 449.6±17.9            | 493.1±11.9        |
| ESV (μl)                         | 100.4±4.7            | 209.4±20.1            | 236.4±10.9        |
| <b>D-1</b> SV (μl)               | 270.9±8.3            | 240.2±7.1             | 256.7±5.4         |
| EF (%)                           | 73.0±0.5             | 54.2±2.8              | 52.3±1.3          |
| Scar [μl]                        | 0                    | 43.6±4.6              | 50.9±5.2          |
| Infarct [% of LVM]               | 0                    | 8.3±1.3               | 9.7±1.0           |
| LV mass (mg)                     |                      | 476.4±9.0             | 498.4±15.1        |
| EDV (μl)                         |                      | 517.3±19.1            | 546.1±10.6        |
| ESV (μl)                         |                      | 289.0±21.4            | 294.4±9.4         |
| <b>D28</b> SV (μl)               |                      | 228.3±10.0            | 251±10.2          |
| EF (%)                           |                      | 43.8±2.5              | 46.0±1.5          |
| Scar [μl]                        |                      | 44.6±2.5              | 45.2±2.3          |
| Infarct [% of LVM]               |                      | 9.2±1.1               | 9.7±0.7           |

Results are presented as mean ± SEM. LV: left ventricle; EDV: end-diastolic volume; ESV: end-systolic volume; SV: stroke volume; EF: ejection fraction; CO: cardiac output; Infarct (% of LVM): percentile of scar mass to left ventricle mass.

**Supplemental Table 2. Global and regional strains measured by cardiac MRI and ultrasound at D-1 and D28**

| Rat No.        | Circumferential Strain $E_{CC}$ (%) |          |           |          |          |           |            |          |           |          |          |           |       |
|----------------|-------------------------------------|----------|-----------|----------|----------|-----------|------------|----------|-----------|----------|----------|-----------|-------|
|                | MRI                                 |          |           |          |          |           | Ultrasound |          |           |          |          |           |       |
|                | D-1                                 |          |           | D28      |          |           | D-1        |          |           | D28      |          |           |       |
|                | <i>G</i>                            | <i>S</i> | <i>RZ</i> | <i>G</i> | <i>S</i> | <i>RZ</i> | <i>G</i>   | <i>S</i> | <i>RZ</i> | <i>G</i> | <i>S</i> | <i>RZ</i> |       |
| <b>Control</b> | 1                                   | -13.8    | -10.8     | -23.7    | -10.8    | -3.6      | -14.6      | -21.7    | -22.3     | -33.6    | -6.3     | -6.1      | -10.1 |
|                | 2                                   | -20.0    | -15.7     | -26.0    | -19.4    | -14.4     | -22.6      | -15.9    | -9.3      | -22.1    | -12.1    | -11.0     | -8.5  |
|                | 3                                   | -15.6    | -11.4     | -22.7    | -11.6    | -10.4     | -16.4      | -10.2    | -9.0      | -11.9    | -16.4    | -3.8      | -12.1 |
|                | 4                                   | -22.9    | -22.2     | -24.7    | -12.2    | -10.3     | -16.5      | -14.8    | -7.3      | -23.3    | -18.0    | -24.4     | -19.9 |
|                | 5                                   | -19.6    | -13.9     | -25.2    | -16.3    | -8.4      | -20.4      | -13.5    | -6.4      | -17.6    | -11.9    | -5.3      | -16.7 |
|                | 6                                   | -13.4    | -9.5      | -20.1    | -11.9    | -7.2      | -17.9      | -8.5     | -2.5      | -13.7    | -8.2     | -7.6      | -12.9 |
|                | 7                                   | -15.7    | -9.3      | -24.0    | -12.8    | -6.4      | -23.2      | -18.1    | -13.4     | -17.1    | -11.5    | -10.9     | -16.2 |
|                | 8                                   | -12.7    | -8.7      | -21.3    | -14.1    | -9.2      | -24.0      | -16.8    | -12.5     | -21.3    | -11.3    | -7.9      | -18.4 |
|                | 9                                   | -17.9    | -15.3     | -25.7    | -16.0    | -9.2      | -23.3      | -12.3    | -11.1     | -14.1    | -7.3     | -3.2      | -25.1 |
|                | 10                                  | -20.9    | -17.9     | -21.4    | -15.6    | -11.5     | -17.5      | -20.1    | -15.5     | -29.1    | -12.1    | -8.5      | -19.1 |
| <b>EHM</b>     | 1                                   | -21.0    | -16.4     | -22.7    | -18.7    | -15.8     | -18.8      | -13.0    | -14.5     | -23.1    | -12.0    | -14.2     | -17.7 |
|                | 2                                   | -18.3    | -16.0     | -22.9    | -12.7    | -10.8     | -16.3      | -14.6    | -13.3     | -17.7    | -12.5    | -18.0     | -11.9 |
|                | 3                                   | -17.2    | -11.3     | -22.6    | -16.8    | -14.3     | -16.5      | -15.1    | -25.1     | -18.0    | -9.8     | -7.4      | -11.1 |
|                | 4                                   | -19.4    | -18.6     | -24.1    | -15.5    | -11.1     | -23.6      | -11.4    | -11.3     | -12.6    | -10.7    | -15.3     | -7.9  |
|                | 5                                   | -13.4    | -12.1     | -18.6    | -15.7    | -11.4     | -19.8      | -13.2    | -16.1     | -13.6    | -13.8    | -8.3      | -16.4 |
|                | 6                                   | -16.3    | -11.8     | -20.3    | -14.8    | -10.6     | -14.8      | -19.7    | -10.0     | -20.8    | -13.0    | -7.8      | -15.1 |
|                | 7                                   | -14.0    | -5.4      | -17.0    | -14.3    | -7.3      | -24.7      | -8.0     | -19.1     | -8.8     | -12.8    | -8.1      | -12.9 |
|                | 8                                   | -14.8    | -12.8     | -24.2    | -15.9    | -14.3     | -22.3      | -15.6    | -18.0     | -20.1    | -6.3     | -5.3      | -7.6  |
|                | 9                                   | -15.3    | -9.9      | -24.0    | -15.7    | -11.5     | -21.8      | -21.0    | -25.5     | -20.1    | -12.5    | -5.9      | -15.1 |
|                | 10                                  | -16.3    | -12.7     | -22.9    | -14.1    | -7.3      | -19.0      | -13.4    | -8.6      | -14.0    | -9.8     | -3.0      | -13.4 |
|                | 11                                  | -16.4    | -13.3     | -22.5    | -15.7    | -11.2     | -22.1      | -15.4    | -12.9     | -17.0    | -21.1    | -17.6     | -26.5 |
|                | 12                                  | -12.9    | -11.0     | -22.4    | -13.8    | -12.8     | -14.8      | -22.8    | -7.3      | -36.4    | -18.8    | -12.1     | -26.8 |
| <b>Healthy</b> | 1                                   | -23.5    | -29.5     | -21.0    |          |           |            | -21.2    | -32.0     | -19.4    |          |           |       |
|                | 2                                   | -30.9    | -36.1     | -32.4    |          |           |            | -21.9    | -26.5     | -19.4    |          |           |       |
|                | 3                                   | -25.5    | -25.5     | -29.1    |          |           |            | -28.4    | -29.6     | -27.9    |          |           |       |
|                | 4                                   | -20.4    | -19.9     | -21.7    |          |           |            | -34.1    | -46.4     | -29.7    |          |           |       |
|                | 5                                   | -23.7    | -25.2     | -26.1    |          |           |            | -35.5    | -36.9     | -35.9    |          |           |       |
|                | 6                                   | -20.9    | -29.9     | -24.5    |          |           |            | -28.2    | -22.4     | -38.7    |          |           |       |

EHM: group transplanted with engineered heart muscle; MRI: magnetic resonance imaging; D-1: 1 day before EHM transplantation; D28: 28 days after EHM transplantation; G: global strain; S: scar strain; RZ: remote zone strain.
